# Supplementary material
Source: ML conference proceedings conference paper supplement (https://openaccess.thecvf.com/content/ICCV_2019/html/Hsiao_Fashion_Minimal_Edits_ICCV_2019_paper.html)
Supplement: Supplementary file 1 [file Hsiao_Fashion_Minimal_Edits_ICCV_2019_supplemental.pdf]

# Fashion++: Minimal Edits for Outfit Improvement (Supplementary File)

Wei-Lin Hsiao<sup>1,4</sup> Isay Katsman<sup>2,4\*</sup> Chao-Yuan Wu<sup>1,4\*</sup> Devi Parikh<sup>2,4</sup> Kristen Grauman<sup>1,4</sup>

<sup>1</sup>UT Austin <sup>2</sup>Cornell Tech <sup>3</sup>Georgia Tech <sup>4</sup>Facebook AI Research

This supplementary file consists of:

- Implementation details of the complete Fashion++ system presented in Section 4 of the main paper
- Ablation study on our outfit’s representation (referenced in Section 3.2 of the main paper)
- Details on shape generation
- More details on the automatic evaluation metric defined in Section 4.1 of the main paper
- More examples of Fashion++ edits
- MTurk interfaces for the three human subject studies provided in Section 4.2 of the main paper
- Full results and Turkers’ verbal rationales (as a word-cloud) for user study A (Section 4.2 of the main paper)
- Examples of Turkers’ verbal descriptions of what actions to perform in user study C (Section 4.2 of the main paper)

## I. Implementation details

**Training.** We have two generators, a GAN for texture and a VAE for shape, and a classifier for editing operations. All generation networks are trained from scratch, using the Adam solver [1] and a learning rate of 0.0002. For VAE, we keep the same learning rate for the first 100 epochs and linearly decay the rate to zero over the next 200 epochs. For GAN, we keep the same learning rate for the first 100 epochs and linearly decay the rate to zero over the next 100 epochs. For the fashionability classifier, we train from scratch with the Adam solver with weight decay 0.0001 and a learning rate of 0.001. We keep the same learning rate for the first 60 epochs and decay it 10 times every 20 epochs until epoch 120.

For the GAN, we adopt the architecture from [3]. For the VAE, our architecture is defined as follows: Let  $c7s1-k$  denote a  $7 \times 7$  convolutional block with  $k$  filters and stride 1.  $dk$  denotes a  $3 \times 3$  convolutional block with  $k$  filters and

stride 2.  $Rk$  denotes a residual block that contains two  $3 \times 3$  convolutional blocks with  $k$  filters.  $pk$  denotes a layer reflection padding 3 on all boundaries.  $fc_k$  denotes a fully connected layer with  $k$  filters. We use Instance Normalization (IN) [2] and ReLU activations. The VAE consists of:

- Encoder:  $p3, c7s1-16, d32, d64, d128, d128, d128, d128, R128, R128, R128, R128, R128, R128, R128, R128, fc8$
- Decoder:  $d128, d128, d128, d128, d128, d64, d32, d16, p3, c7s1-18$

where the encoder is adapted from [3] and decoder from [4]. Our MLP for the fashionability classifier is defined as:  $fc256, fc256, fc128, fc2$ . For shape and texture features, both  $d_s$  and  $d_t$  are 8. For the fashionability classifier to perform edits, we use an SGD solver with step size 0.1.

**Baselines.** Since the encodings’ distribution of inventory garments is not necessarily Gaussian, the RANDOM baseline samples from inventory garments for automatic evaluation, and from a standard Gaussian for human subject study B.

**Post-processing.** As our system did not alter clothing-irrelevant regions, and to encourage viewers to focus on clothing itself, we automatically replace the generated hair/face region with the original, using their segmentation maps.

## II. Ablation study

We use  $d_s, d_t = 8$  throughout our paper. Here, we show the effect of texture and shape feature on their own, and how the dimension of the feature affects our model. We measure the feature’s effect by the fashionability classifier (MLP)’s validation accuracy. We compare just using texture, just using shape, and using the concatenation of the two in Tab. 1(a): we found that shape is a more discriminative feature than texture. We tried  $d_t = 3, 8$ , and found that  $d_t = 8$  gives qualitatively more detailed images than  $d_t = 3$ , but continuing increasing  $d_t$  beyond 8 does not give qualitatively better result. Tab. 1(b) shows the feature dimension’s effect on the quantitative results, where left is

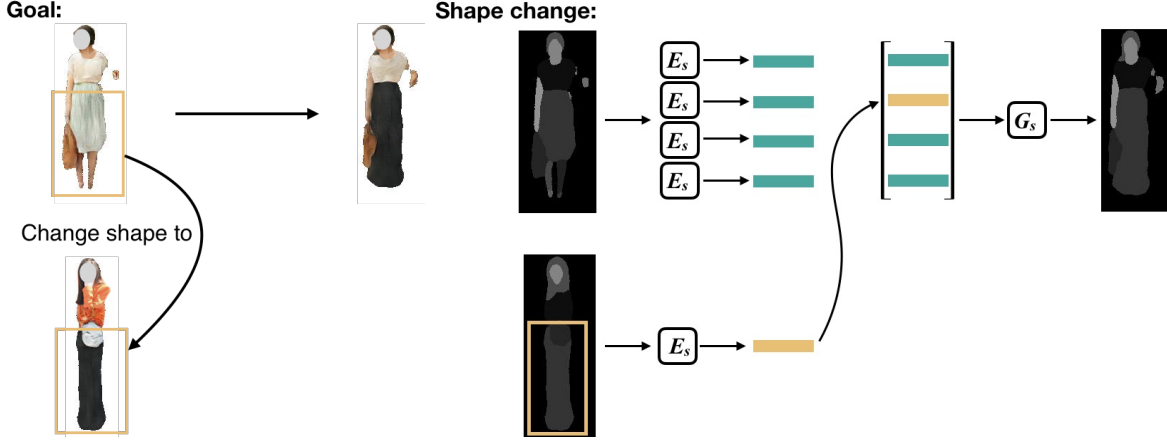

Figure 1: Shape generation using our shape-VAE. In this example, the goal is to change the girl’s midi skirt to a long skirt. We encode each garment separately, overwrite the skirt’s code with the code from the long skirt, and generate the final changed silhouette for the outfit.

| texture | shape | texture + shape | texture |       | texture + shape |       |
|---------|-------|-----------------|---------|-------|-----------------|-------|
|         |       |                 | 3       | 8     | 3               | 8     |
| 0.663   | 0.741 | 0.751           | 0.576   | 0.663 | 0.717           | 0.751 |

(a) Feature selection. (b) Feature dimension.

Table 1: Ablation study on how the outfit’s features affect the accuracy of the fashionability classifier.

just using the texture as the feature and right is concatenating both texture and shape feature. In both cases, increasing  $d_t$  makes our features more discriminative.

### III. More details about shape generation

Here, we walk through the process of how our shape generator controls the silhouette of each garment. If our goal is to change an outfit’s skirt, as in Fig. 1 left, our shape encoder  $E_s$  first encodes each garment separately, and then overwrites the skirt’s code with the skirt we intend to change to. Finally, we concatenate each garment’s code into  $s = [s_0; \dots; s_{n-1}]$ , and our shape generator  $G_s$  decodes it back to a region map. This process is shown in Fig. 1 right.

### IV. Automatic evaluation metric

To automatically evaluate fashionability improvement, we need ground-truth (GT) garments to evaluate against. To capture multiple ways to improve an outfit, we form a set of GT garments per outfit, as noted in Section 4.1 of the main paper. Our insight is that the garments that go well with a given blouse appear in outfits that also have blouses similar to this one. As a result, we take the corresponding region’s garments, that is the pants or skirts worn with these similar blouses, to form this set. To do so, we first find the  $M$  nearest neighbors of the unfashionable outfit *excluding the swapped out piece* (Fig. 2 left), and then take the corresponding pieces in these  $M$  neighbors (Fig. 2 right) as  $M$

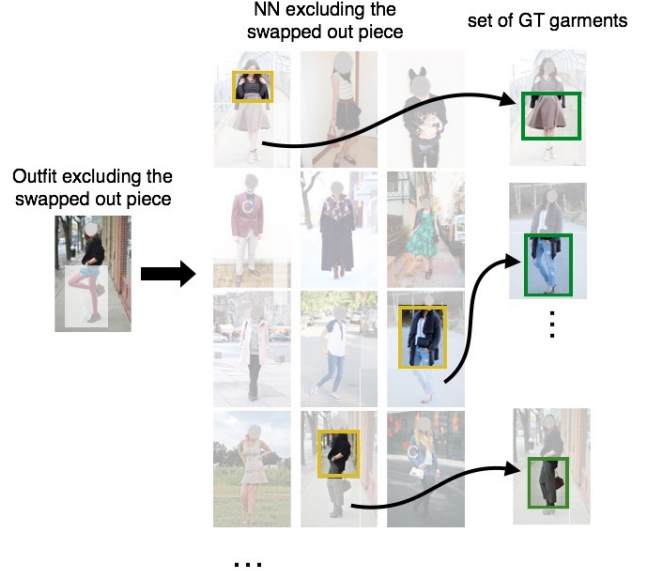

Figure 2: Formulating the set of GT garments per negative outfit.

possible ways to make this outfit fashionable. We use the minimal distance of the original piece to all  $K$  pieces in GT set as the original piece’s distance to GT. Using median or mean gives similar results.

### V. More qualitative examples

Due to the sake of space, we show one Fashion++ edit for each example in Section 4.3 of the main paper. In Fig. 3, we show more editing examples by Fashion++, and for each one we display the editing spectrum from  $K = 1$  to 6. Fig. 3(a) is the full spectrum for one of the examples in Fig. 6 of the main paper. The outfit starts changing by becoming sleeveless and tucked in, and then colors become even brighter as more edits are allowed. (b) changes

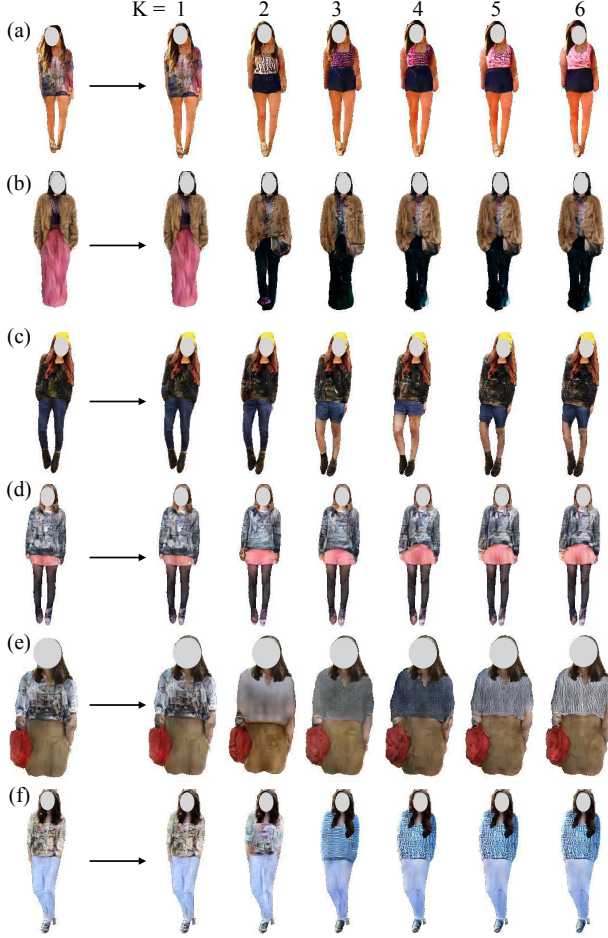

Figure 3: Spectrum of edits ( $K = 1$  to 6) by Fashion++: the first column are the original outfits, and starting from the second are gradually editing the outfits more by taking more gradient steps, from 1 to 6.

the pink long skirt to black flared pants, which actually are not too different in shape, but makes the outfit more energetic and better color matching. (c) gradually shortens the length of the jeans to shorts. (d) tucks in more amount of the sweater. Both (e) and (f) change the pattern of the blouses to match the bottom better. In most examples, edits typically start saturating after  $K = 4$ , and changes are less obvious after  $K = 6$ .

## VI. Mechanical Turk Interface

Fig. 8, Fig. 9, and Fig. 10 show our MTurk interfaces for the three human subject studies presented in the main paper. We give them the definition of minimal editing and good/bad examples of edits, and tell them to ignore artifacts in synthesized images. For A, we ask them to (i) choose whether any of the changed outfits become more fashionable, and (ii) which is the best minimal edited outfit and (iii) why. For B, we ask them two questions comparing the

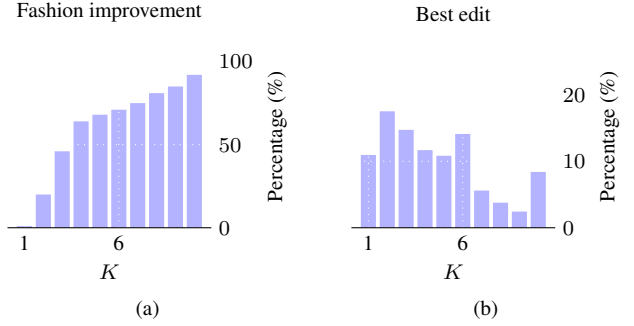

Figure 4: Results breaking down  $K$  for user study A: (a) which of the changed outfits become more fashionable, and (b) which edited outfit makes the best minimal edit to the original outfit.

changed outfit to the original: (i) whether the changed outfit remains similar, and (ii) whether the changed outfit is more fashionable. For C, we ask them if (i) they understand what to change given the original and changed outfit, and (ii) describe it verbally.

## VII. Detailed result for user study A

For question (i) in user study A, since there should be a consensus on fashionability improvement, we aggregate the responses over all subjects for each example. Each of the 100 testing examples will be judged as either improved or not improved for every  $K$ . The result is summarized in Fig. 4a. As more changes are made (increasing  $K$ ), more examples are rated as improving fashionability, with 92% of them improved when  $K = 10$ .

Question (ii) is subjective in nature: different people prefer a different trade-off (between the amount of change versus the amount of fashionability added), so we treat response from each subject individually. The result is summarized in Fig. 4b. No specific  $K$  dominates, and a tendency of preferring  $K \leq 6$  is observed, in total 80% of the time.

For question (iii), we ask users their reasons to selecting a specific  $K$  in question (ii). Examples of Turkers' responses are in Fig. 6. From phrases such as *add contrast*, *offer focus*, *pop*, or *catchy* in these examples, and a word cloud made from all responses (Fig. 5), we can tell that a common reason a user prefer an outfit is it being more attractive/interesting.

## VIII. Verbal descriptions of actionable edits for user study C.

In the experiment presented as user study C in the main paper, we asked Turkers to rate how actionable the suggested edit is, and briefly describe the edit in words. Fig. 7 shows example descriptions from human judges. Each ex-

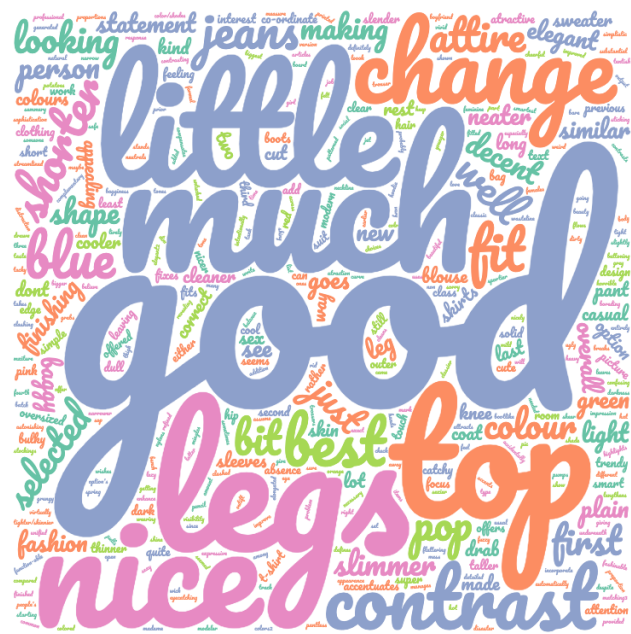

Figure 5: Summary in word cloud of why a changed outfit is preferred in user study A.

ample has 6 to 7 different descriptions from different people. For example, despite mild artifacts in Fig. 7(a), humans still reach consensus on the actionable information. Note that in Fig. 7(b)(c)(d), most people described the edit as changing color/pattern, while in Fig. 7(e)(f) more descriptions are about changing to/adding another garment, because Fig. 7(e)(f) changes garments in a more drastic way. *Tweaking* the color/pattern of a garment is essentially changing to another garment, yet humans perceived this differently. When the overall style of the outfit remains similar, changing to a garment with different colors/patterns seems like a slight change to humans.

## References

- [1] D. P. Kingma and J. Ba. Adam: A method for stochastic optimization. In *ICLR*, 2015. 1
- [2] D. Ulyanov, A. Vedaldi, and V. S. Lempitsky. Improved texture networks: Maximizing quality and diversity in feed-forward stylization and texture synthesis. In *CVPR*, 2017. 1
- [3] T.-C. Wang, M.-Y. Liu, J.-Y. Zhu, A. Tao, J. Kautz, and B. Catanzaro. High-resolution image synthesis and semantic manipulation with conditional gans. In *CVPR*, 2018. 1
- [4] J.-Y. Zhu, R. Zhang, D. Pathak, T. Darrell, A. A. Efros, O. Wang, and E. Shechtman. Toward multimodal image-to-image translation. In *NIPS*, 2017. 1

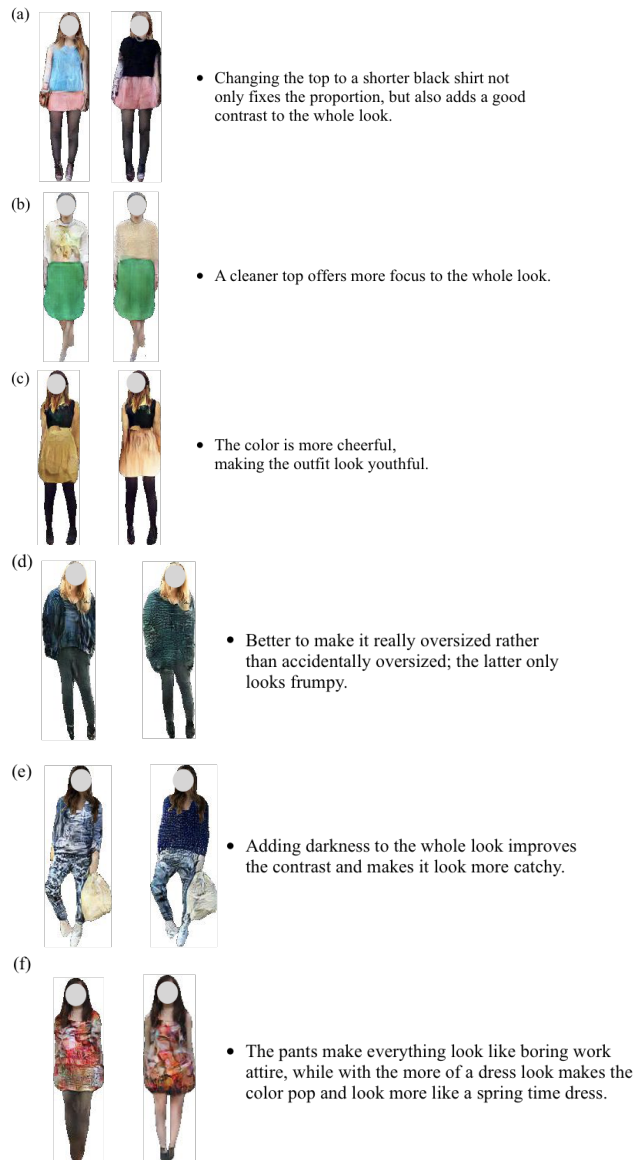

Figure 6: Examples of Turkers’ responses to user study A: pairs of images on the left show the original outfits and the changed outfits generated by Fashion++ preferred by the user. Corresponding sentences on the right are their verbal explanation for why they make such selection.

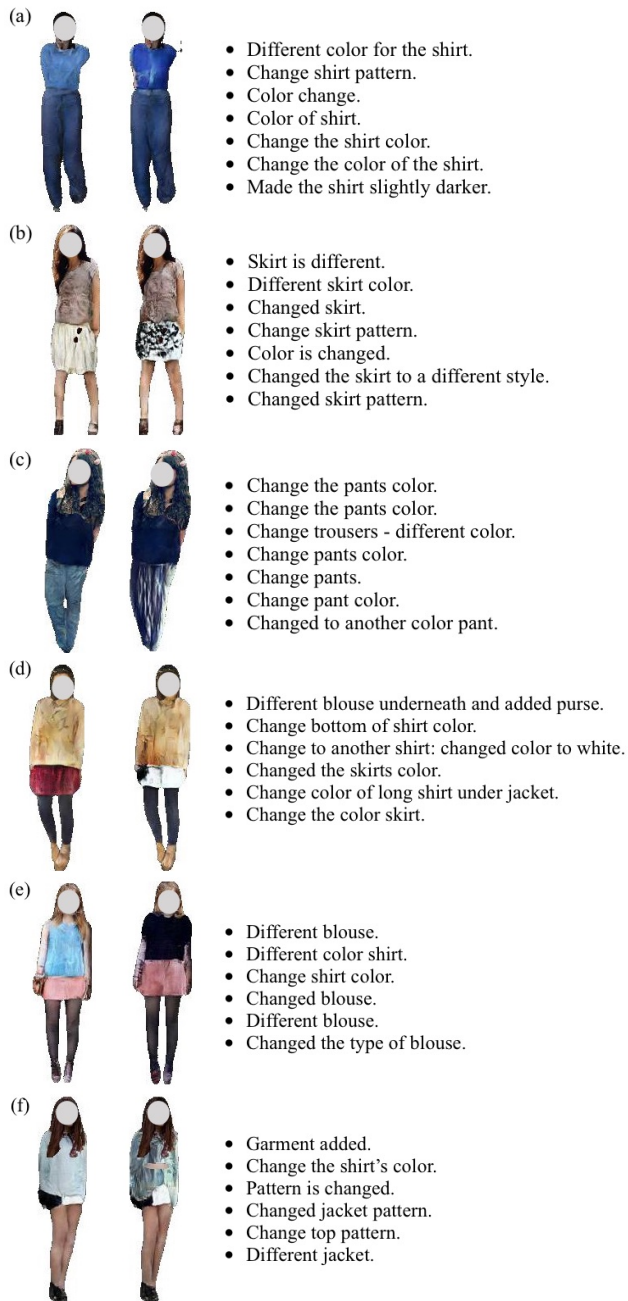

Figure 7: Examples of Turkers' verbal descriptions about what is changed in a Fashion++ edit. Despite mild artifacts in the edits, note how humans reach consensus about what change is being recommended by the system.



## Instructions

Task: Tell us whether the changed outfit remains similar to the original but more fashionable.

- Minimal editing is about making an outfit look more fashionable while not changing it too much. We will show you an original image followed by 10 candidates, and you will judge:
  - Which candidates are more fashionable than original.
  - Which candidate do you think is the best change.
- The very best change would improve fashionability but **not** change the outfit too much.
- However, a change that improves fashionability but changes the outfit more noticeably is still to be considered as good.

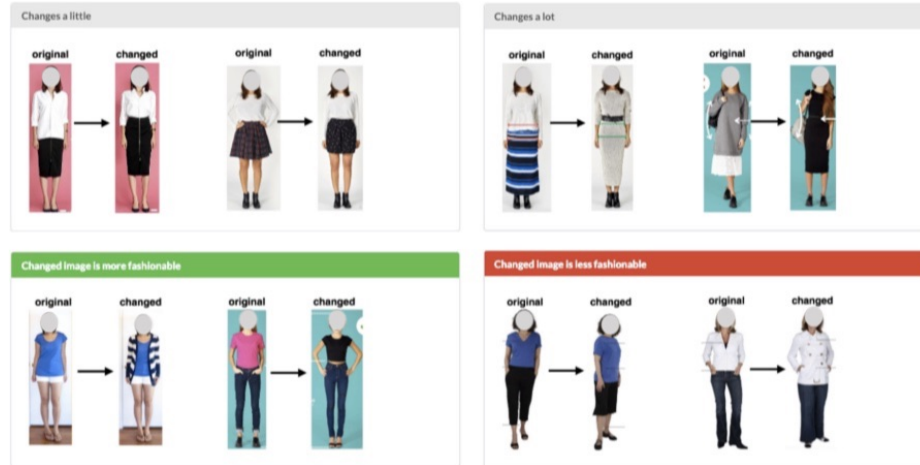

Note: Our images are synthetic images, and the focus of this task is on clothing itself, so please do not let any artifacts caused by image synthesis affect your decision.

- The images are blurry. Please ignore the blur when making your decision.
- The images may have other unnatural artifacts on the faces or limbs. Please ignore these artifacts when making your decision.

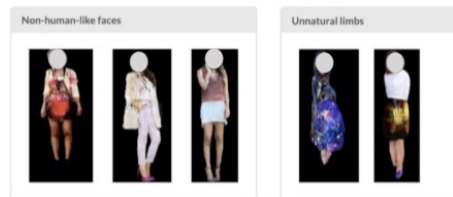

## Task

1. Original:  → Changed: 

1. Select ALL images that look more fashionable than the original.

- Note that you can select multiple images here.

- Since some images are identical, we will automatically check all images BEYOND the one you select.

- Please UNCHECK the ones you think are NOT more fashionable.

2. Which changed image offers the BEST balance in improving the fashionability without changing the outfit too much?

3. Explain why you think the option you selected in Question 2 is best.

Examples:

- It makes the waistline higher which looks like the legs are longer.
- The colors match better.
- The original outfit is too boring. It adds good patterns to the skirt.

Figure 8: Interface for human subject study A: understanding to what extent a given degree of change is preferred and why.

## Instructions

Task: Tell us whether the changed outfit remains similar to the original but more fashionable.

- Minimal editing is about making an outfit look more fashionable while not changing it too much. We will show you a pair of images, and you will judge whether:
  - a) The second one is more fashionable.
  - b) The second one is not too different from the first.
- The very best change would improve fashionability but **not** change the outfit too much.
- However, a change that improves fashionability but changes the outfit more noticeably is still to be considered as good.

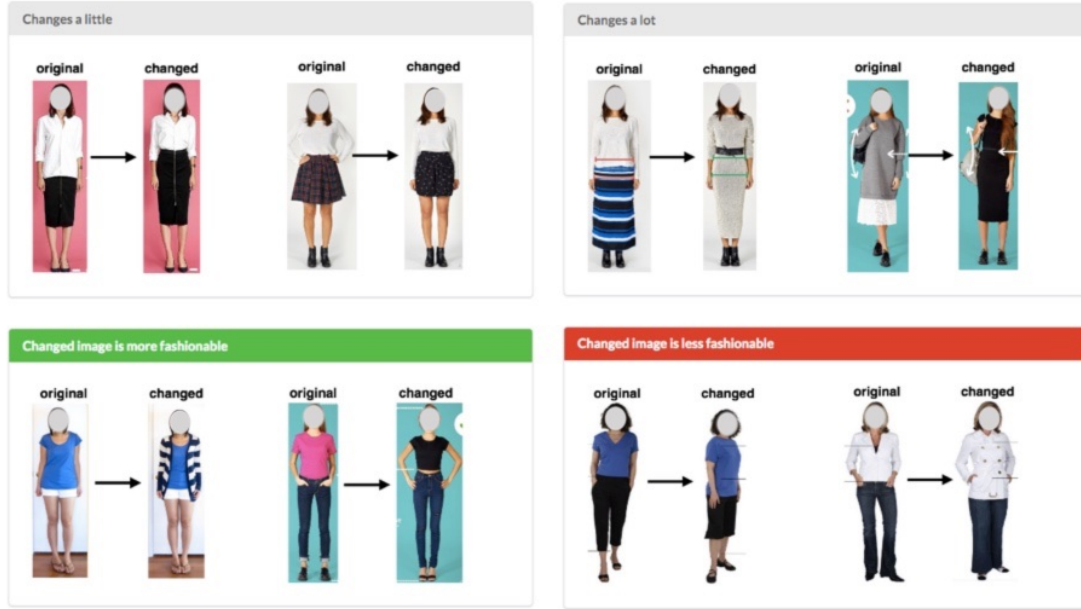

Note: Our images are synthetic images, and the focus of this task is on clothing itself, so please do not let any artifacts caused by image synthesis affect your decision.

- The images are blurry. Please ignore the blur when making your decision.
- The images may have other unnatural artifacts on the faces or limbs. Please ignore these artifacts when making your decision.

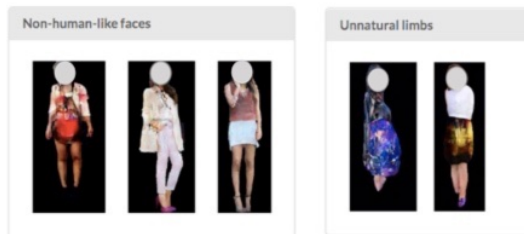

## Task

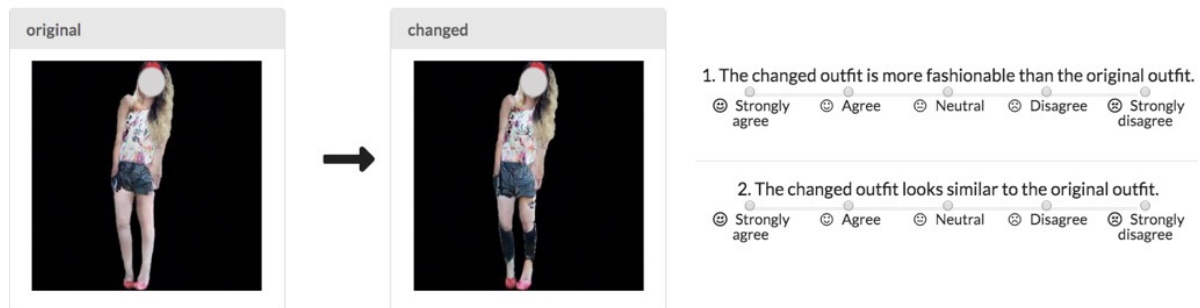

Figure 9: Interface for human subject study B: understanding how Fashion++ compares to the baselines.

## Instructions

Task: Tell us whether you understand what the system is recommending you to change for the outfit.

- The system could change the outfit by the following (but not limited to):

- Rolling sleeves/pants up.
- Tucking shirt in.
- Adding another garment.
- Taking off some garment(s).
- Changing to another garment, where its:
  - Color is changed.
  - Pattern is changed.
  - Cut is changed.

- Example images of these changes are:

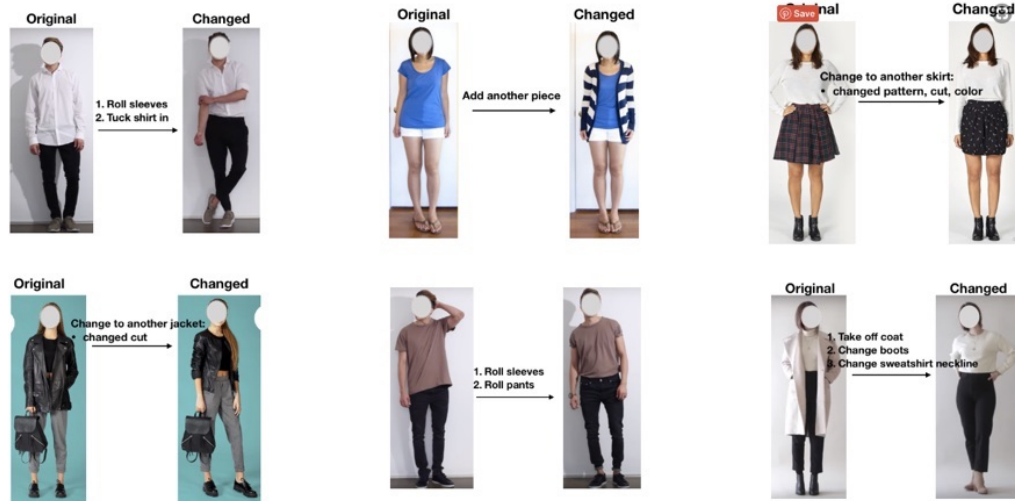

- If the system is not changing outfit, it will be like this:

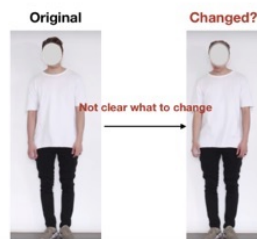

## Task

original



➔

changed



1. I can tell what the system recommends to change for the outfit.

☹️ Strongly disagree
☹️ Disagree
☹️ Neutral
😊 Agree
😊 Strongly agree

2. Describe what the system changed for the outfit:

(Examples: Roll up the sleeves, change the skirt's color, change the pants length, etc.)

(Enter "None", "N/A" if the system does not change the outfit.)

Figure 10: Interface for human subject study C: understanding whether humans can get *actionable information* from the suggested edits.
